# Supplementary material for: Chiropractic spinal manipulative therapy for cervicogenic headache: a single-blinded, placebo, randomized controlled trial
Source: PubMed Central journal article supplement (PMC5525198; doi:10.1186/s13104-017-2651-4), 2017-07-24

## Participants flow diagram

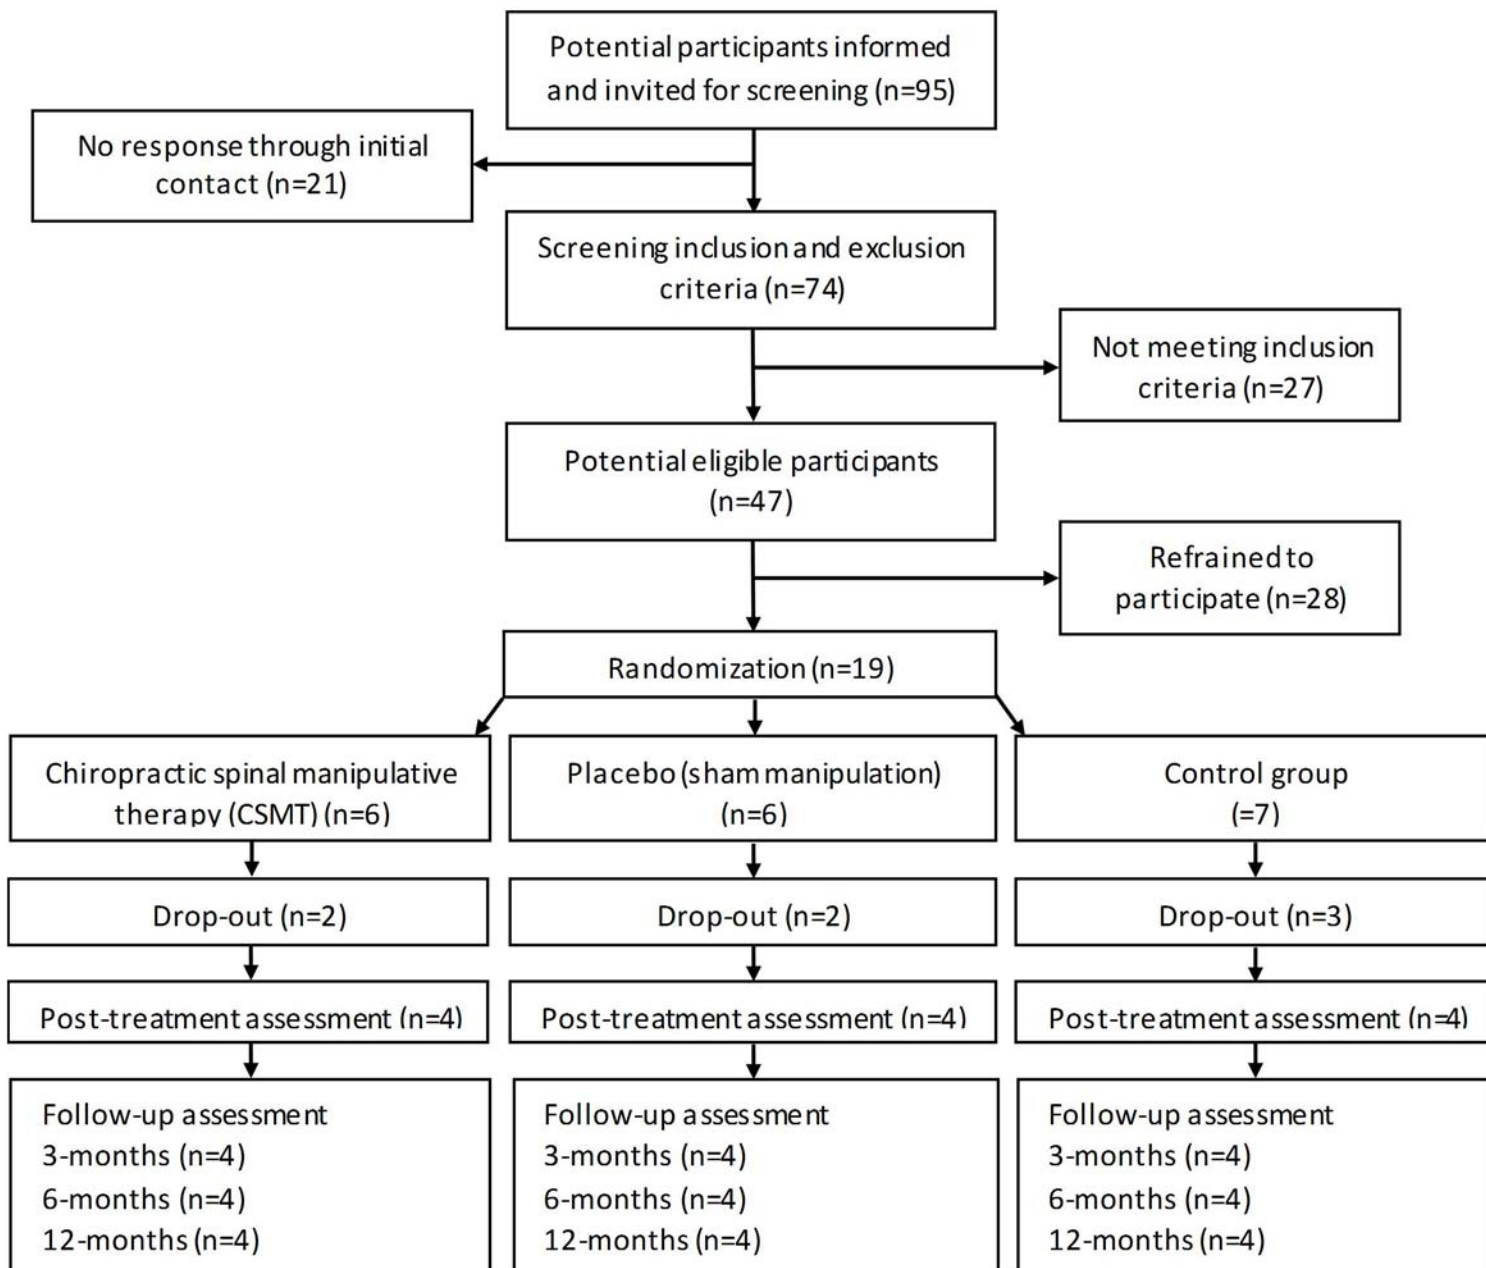

Supplement: 13104_2017_2651_MOESM1_ESM.pdf [file 13104_2017_2651_MOESM1_ESM.pdf]
